# Supplementary material for: Comparison of cancer incidence and mortality in the Norwegian Fire Departments Cohort, 1960–2018
Source: HighWire-hosted journal article supplement (doi:10.1136/oemed-2022-108331), 2022-05-19
Supplement: oemed-2022-108331supp001_data_supplement.pdf [file oemed-2022-108331supp001_data_supplement.pdf]

## SUPPLEMENTARY MATERIAL

**Supplementary table 1.** Observed number of cases/deaths and standardized incidence/mortality ratios (SIRs/SMRs) with 95% confidence intervals (CIs) among male firefighters in the Norwegian Fire Departments Cohort (n=3881), follow-up from January 1, 1960 to December 31, 2018.

| Cancer site                     | ICD-10       | Incidence                              |      |           | Mortality |      |           |
|---------------------------------|--------------|----------------------------------------|------|-----------|-----------|------|-----------|
|                                 |              | Obs.                                   | SIR  | 95% CI    | Obs.      | SMR  | 95% CI    |
| All cancers                     | C00-C97      | <i>Reported previously<sup>b</sup></i> |      |           | 348       | 1.08 | 0.97–1.20 |
| Lip                             | C00          | <5                                     | 0.56 | 0.11–1.62 | 0         | 0.00 | 0.00–13.3 |
| Oral cavity                     | C02-C06      | <5                                     | 0.73 | 0.20–1.86 | 0         | 0.00 | 0.00–3.04 |
| Pharynx                         | C09-C14, C01 | 11                                     | 1.61 | 0.80–2.88 | <5        | 1.05 | 0.29–2.69 |
| Esophagus                       | C15          | 13                                     | 1.55 | 0.83–2.66 | 14        | 1.96 | 1.07–3.28 |
| Esophagus, corrected†           |              |                                        |      |           | 13        | 1.82 | 0.97–3.11 |
| Stomach                         | C16          | 38                                     | 1.35 | 0.95–1.85 | 26        | 1.18 | 0.77–1.74 |
| Stomach, corrected†             |              |                                        |      |           | 28        | 1.28 | 0.85–1.84 |
| Colon                           | C18          | 74                                     | 1.24 | 0.98–1.56 | 34        | 1.26 | 0.87–1.76 |
| Rectum, rectosigmoid            | C19-C21      | 37                                     | 0.96 | 0.68–1.33 | 18        | 1.16 | 0.69–1.84 |
| Liver                           | C22          | 8                                      | 1.43 | 0.62–2.81 | 7         | 1.38 | 0.56–2.85 |
| Gallbladder, bile ducts         | C23-C24      | <5                                     | 1.13 | 0.31–2.89 | 5         | 2.51 | 0.82–5.86 |
| Gallbladder, bile ducts†        |              |                                        |      |           | <5        | 2.01 | 0.55–5.15 |
| Liver, gallbladder, bile ducts† | C22-C24      | 12                                     | 1.31 | 0.68–2.29 | 11        | 1.56 | 0.78–2.79 |
| Pancreas                        | C25          | 24                                     | 1.22 | 0.78–1.81 | 20        | 1.09 | 0.67–1.68 |
| Larynx                          | C32          | <i>Reported previously<sup>b</sup></i> |      |           | <5        | 1.92 | 0.52–4.91 |
| Lung                            | C33-C34      | <i>Reported previously<sup>b</sup></i> |      |           | 61        | 0.91 | 0.69–1.16 |
| Cutaneous melanoma              | C43          | <i>Reported previously<sup>b</sup></i> |      |           | 13        | 1.55 | 0.83–2.65 |
| Non-melanoma skin*              | C44          | <i>Reported previously<sup>b</sup></i> |      |           | <5        | 0.95 | 0.02–5.31 |
| Mesothelioma                    | C45          | <i>Reported previously<sup>b</sup></i> |      |           | <5        | 1.80 | 0.37–5.27 |
| Mesothelioma, corrected†        |              |                                        |      |           | <5        | 2.40 | 0.65–6.15 |
| Prostate                        | C61          | 214                                    | 1.18 | 1.03–1.35 | 54        | 1.07 | 0.80–1.39 |
| Testis                          | C62          | 17                                     | 1.39 | 0.81–2.22 | 0         | 0.00 | 0.00–3.07 |
| Kidney**                        | C64          | <i>Reported previously<sup>b</sup></i> |      |           | 10        | 0.97 | 0.46–1.78 |
| Urinary tract***                | C65-C68      | <i>Reported previously<sup>b</sup></i> |      |           | 15        | 1.14 | 0.64–1.88 |
| Central nervous system          | C70-C72      | 28                                     | 1.31 | 0.87–1.90 | 14        | 1.41 | 0.77–2.37 |
| Thyroid                         | C73          | 6                                      | 1.45 | 0.53–3.15 | <5        | 2.41 | 0.29–8.70 |
| Hodgkin lymphoma                | C81          | <i>Reported previously<sup>b</sup></i> |      |           | 0         | 0.00 | 0.00–2.31 |
| Non-Hodgkin lymphoma            | C82-C86, C96 | <i>Reported previously<sup>b</sup></i> |      |           | 9         | 0.96 | 0.44–1.83 |
| Multiple myeloma                | C90          | <i>Reported previously<sup>b</sup></i> |      |           | 7         | 0.97 | 0.39–2.00 |
| Leukaemia                       | C91-C95      | <i>Reported previously<sup>b</sup></i> |      |           | 10        | 1.00 | 0.48–1.84 |
| Ill-defined or unspecified      | C76, C80     | 8                                      | 0.62 | 0.27–1.22 | 14        | 0.90 | 0.49–1.51 |
| Other specified <sup>a</sup>    |              | 25                                     | 0.93 | 0.60–1.38 | <5        | 0.43 | 0.12–1.11 |

ICD, International Classification of Diseases; Obs., observed.

†Observed number of deaths corrected to be in line with morphologically confirmed diagnoses, as described in the main text (Results, paragraph 3–6)

\*Excluding basal cell carcinoma, \*\*Excluding renal pelvis, \*\*\*Including bladder and renal pelvis.

<sup>a</sup> The 'other specified' group includes the following codes: C07-C08, C17, C26-C31, C37-C38, C40-C41, C46-C50, C56-C57, C60, C63, C69, C74-C75, C88, C97.

<sup>b</sup> Results previously reported in Marjerrison et al (2022) have been omitted from this table.

**Supplementary table 2.** Observed number of cases or deaths and standardized incidence ratios (SIRs) or standardized mortality ratios (SMRs) with 95% confidence intervals (CIs) for selected cancer sites among male firefighters in the Norwegian Fire Departments Cohort (n=3881), stratified by period of follow-up. Follow-up from January 1, 1960 to December 31, 2018.

| Cancer site                          | ICD-10  | Period of follow-up |       |            |                        |       |           |                    |       |           |
|--------------------------------------|---------|---------------------|-------|------------|------------------------|-------|-----------|--------------------|-------|-----------|
|                                      |         | ≤1984 (33 180 pyr)  |       |            | 1985–1994 (19 644 pyr) |       |           | ≥1995 (55 534 pyr) |       |           |
|                                      |         | Obs.                | Ratio | 95% CI     | Obs.                   | Ratio | 95% CI    | Obs.               | Ratio | 95% CI    |
| All cancers, SIR                     | C00-C97 | 140                 | 1.21  | 1.02–1.43  | 139                    | 1.17  | 0.98–1.38 | 566                | 1.13  | 1.04–1.23 |
| All cancers, SMR                     | C00-C97 | 84                  | 1.25  | 1.00–1.55  | 70                     | 1.12  | 0.87–1.41 | 194                | 1.02  | 0.88–1.17 |
| Esophagus, SIR                       | C15     | <5                  | 2.15  | 0.44–6.29  | <5                     | 1.60  | 0.19–5.78 | 8                  | 1.40  | 0.60–2.76 |
| Esophagus†, SMR                      | C15     | <5                  | 2.35  | 0.48–6.86  | <5                     | 1.74  | 0.21–6.29 | 8                  | 1.69  | 0.73–3.33 |
| Stomach, SIR                         | C16     | 15                  | 1.39  | 0.78–2.29  | 10                     | 1.64  | 0.79–3.02 | 13                 | 1.15  | 0.61–1.96 |
| Stomach†, SMR                        | C16     | 12                  | 1.35  | 0.7–2.36   | 9                      | 1.88  | 0.86–3.56 | 7                  | 0.85  | 0.34–1.75 |
| Colon, SIR                           | C18     | 16                  | 2.02  | 1.15–3.28  | 14                     | 1.41  | 0.77–2.37 | 44                 | 1.05  | 0.77–1.42 |
| Colon, SMR                           | C18     | 10                  | 2.33  | 1.12–4.29  | 9                      | 1.79  | 0.82–3.39 | 15                 | 0.85  | 0.48–1.40 |
| Rectum, rectosigmoid, SIR            | C19-C21 | <5                  | 0.63  | 0.17–1.62  | 6                      | 0.86  | 0.31–1.87 | 27                 | 1.07  | 0.71–1.56 |
| Rectum, rectosigmoid, SMR            | C19-C21 | <5                  | 0.89  | 0.18–2.60  | <5                     | 0.57  | 0.07–2.05 | 13                 | 1.51  | 0.80–2.58 |
| Liver, gallbladder, bile ducts, SIR  | C22-C24 | 5                   | 3.62  | 1.17–8.44  | <5                     | 1.46  | 0.18–5.29 | 5                  | 0.78  | 0.25–1.82 |
| Liver, gallbladder, bile ducts†, SMR | C22-C24 | <5                  | 3.03  | 0.83–7.75  | <5                     | 1.91  | 0.23–6.89 | 5                  | 1.07  | 0.35–2.5  |
| Larynx, SIR                          | C32     | 0                   | 0.00  | 0.00–1.77  | 5                      | 3.57  | 1.16–8.33 | 7                  | 1.89  | 0.76–3.90 |
| Larynx, SMR                          | C32     | 0                   | 0.00  | 0.00–5.58  | <5                     | 2.37  | 0.06–13.2 | <5                 | 2.66  | 0.55–7.77 |
| Lung, SIR                            | C33-C34 | 17                  | 1.12  | 0.65–1.79  | 17                     | 1.11  | 0.64–1.77 | 47                 | 0.90  | 0.66–1.20 |
| Lung, SMR                            | C33-C34 | 14                  | 1.09  | 0.59–1.82  | 15                     | 1.11  | 0.62–1.83 | 32                 | 0.78  | 0.53–1.10 |
| Cutaneous melanoma, SIR              | C43     | 5                   | 1.25  | 0.40–2.91  | 11                     | 2.09  | 1.04–3.74 | 31                 | 1.15  | 0.78–1.63 |
| Cutaneous melanoma, SMR              | C43     | <5                  | 1.41  | 0.17–5.08  | <5                     | 2.83  | 0.77–7.25 | 7                  | 1.26  | 0.51–2.60 |
| Non-melanoma skin*, SIR              | C44     | <5                  | 0.77  | 0.09–2.77  | <5                     | 0.60  | 0.12–1.77 | 30                 | 1.07  | 0.73–1.53 |
| Non-melanoma skin*, SMR              | C44     | 0                   | 0.00  | 0.00–16.2  | 0                      | 0.00  | 0.00–18.1 | <5                 | 1.43  | 0.04–7.97 |
| Mesothelioma, SIR                    | C45     | <5                  | 4.23  | 0.11–23.56 | 0                      | 0.00  | 0.00–6.16 | 6                  | 2.82  | 1.04–6.14 |
| Mesothelioma†, SMR                   | C45     | <5                  | -     | -          | 0                      | -     | -         | <5                 | 1.80  | 0.37–5.27 |
| Prostate, SIR                        | C61     | 14                  | 0.83  | 0.45–1.39  | 32                     | 1.33  | 0.91–1.88 | 168                | 1.20  | 1.02–1.39 |
| Prostate, SMR                        | C61     | 6                   | 0.91  | 0.33–1.97  | 7                      | 0.70  | 0.28–1.44 | 41                 | 1.21  | 0.87–1.64 |
| Testis, SIR                          | C62     | <5                  | 1.64  | 0.45–4.21  | 0                      | 0.00  | 0.00–1.34 | 13                 | 1.72  | 0.91–2.93 |
| Testis, SMR                          | C62     | 0                   | 0.00  | 0.00–5.24  | 0                      | 0.00  | 0.00–25.3 | 0                  | 0.00  | 0.00–10.5 |
| Kidney**, SIR                        | C64     | <5                  | 1.07  | 0.29–2.74  | 8                      | 2.40  | 1.04–4.74 | 17                 | 1.09  | 0.64–1.75 |
| Kidney**, SMR                        | C64     | <5                  | 0.43  | 0.01–2.37  | <5                     | 2.00  | 0.54–5.11 | 5                  | 0.83  | 0.27–1.95 |

|                           |              |    |      |           |    |      |            |    |      |            |
|---------------------------|--------------|----|------|-----------|----|------|------------|----|------|------------|
| Urinary tract***, SIR     | C65-C68      | 13 | 1.42 | 0.76–2.43 | 15 | 1.47 | 0.82–2.43  | 41 | 1.14 | 0.82–1.55  |
| Urinary tract***, SMR     | C65-C68      | <5 | 1.20 | 0.25–3.51 | <5 | 1.58 | 0.43–4.05  | 8  | 0.99 | 0.43–1.94  |
| Thyroid, SIR              | C73          | <5 | 1.22 | 0.03–6.78 | 0  | 0.00 | 0.00–5.05  | 5  | 1.83 | 0.59–4.27  |
| Thyroid, SMR              | C73          | <5 | 4.60 | 0.12–25.6 | 0  | 0.00 | 0.00–18.32 | <5 | 2.22 | 0.06–12.38 |
| Hodgkin lymphoma, SIR     | C81          | 0  | 0.00 | 0.00–2.40 | 0  | 0.00 | 0.00–5.32  | <5 | 1.01 | 0.12–3.67  |
| Hodgkin lymphoma, SMR     | C81          | 0  | 0.00 | 0.00–3.80 | 0  | 0.00 | 0.00–15.7  | 0  | 0.00 | 0.00–9.40  |
| Non-Hodgkin lymphoma, SIR | C82-C86, C96 | <5 | 1.03 | 0.21–3.01 | 7  | 2.00 | 0.81–4.13  | 16 | 1.01 | 0.58–1.64  |
| Non-Hodgkin lymphoma, SMR | C82-C86, C96 | <5 | 0.59 | 0.02–3.31 | <5 | 1.01 | 0.12–3.66  | 6  | 1.05 | 0.39–2.29  |
| Multiple myeloma, SIR     | C90          | <5 | 1.39 | 0.29–4.07 | <5 | 1.03 | 0.12–3.72  | <5 | 0.55 | 0.15–1.42  |
| Multiple myeloma, SMR     | C90          | <5 | 1.36 | 0.17–4.93 | <5 | 2.05 | 0.42–5.99  | <5 | 0.47 | 0.06–1.69  |
| Leukaemia, SIR            | C91-C95      | <5 | 1.18 | 0.32–3.03 | <5 | 0.38 | 0.01–2.12  | 9  | 0.84 | 0.38–1.59  |
| Leukaemia, SMR            | C91-C95      | <5 | 1.09 | 0.22–3.18 | <5 | 0.57 | 0.01–3.15  | 6  | 1.10 | 0.40–2.39  |

ICD, International Classification of Diseases; Obs., observed; pyr, person-years. Cells lacking SMR had 0 expected deaths.

†Observed number of deaths corrected to be in line with morphologically confirmed diagnoses, as described in the text (Results, paragraph 3–6).

\*Excluding basal cell carcinoma, \*\*Excluding renal pelvis, \*\*\*Including bladder and renal pelvis.

**Supplementary table 3.** Observed number of cases or deaths and standardized incidence ratios (SIRs) or standardized mortality ratios (SMRs) with 95% confidence intervals (CIs) for selected cancer sites among male firefighters in the Norwegian Fire Departments Cohort (n=3881), stratified by age at diagnosis. Follow-up from January 1, 1960 to December 31, 2018.

| Cancer site               | ICD-10  | Age at diagnosis       |       |           |                          |       |           |                        |       |           |
|---------------------------|---------|------------------------|-------|-----------|--------------------------|-------|-----------|------------------------|-------|-----------|
|                           |         | ≤49 years (60 596 pyr) |       |           | 50–69 years (37 216 pyr) |       |           | ≥70 years (10 546 pyr) |       |           |
|                           |         | Obs.                   | Ratio | 95% CI    | Obs.                     | Ratio | 95% CI    | Obs.                   | Ratio | 95% CI    |
| All cancers, SIR          | C00-C97 | 71                     | 1.06  | 0.83–1.34 | 374                      | 1.09  | 0.98–1.20 | 400                    | 1.23  | 1.11–1.36 |
| All cancers, SMR          | C00-C97 | 16                     | 0.83  | 0.47–1.34 | 123                      | 0.96  | 0.80–1.15 | 209                    | 1.20  | 1.05–1.38 |
| Esophagus, SIR            | C15     | 0                      | 0.00  | 0.00–6.22 | 7                        | 1.54  | 0.62–3.17 | 6                      | 1.80  | 0.66–3.91 |
| Esophagus†, SMR           | C15     | 0                      | 0.00  | 0.00–9.96 | 7                        | 1.88  | 0.76–3.88 | 6                      | 1.91  | 0.70–4.16 |
| Stomach, SIR              | C16     | <5                     | 1.34  | 0.28–3.91 | 21                       | 1.56  | 0.97–2.39 | 14                     | 1.11  | 0.61–1.87 |
| Stomach†, SMR             | C16     | <5                     | 1.93  | 0.4–5.63  | 12                       | 1.20  | 0.62–2.1  | 13                     | 1.25  | 0.67–2.14 |
| Colon, SIR                | C18     | <5                     | 0.80  | 0.16–2.33 | 29                       | 1.16  | 0.78–1.67 | 42                     | 1.36  | 0.98–1.84 |
| Colon, SMR                | C18     | <5                     | 0.75  | 0.02–4.19 | 16                       | 1.63  | 0.93–2.65 | 17                     | 1.07  | 0.62–1.72 |
| Rectum, rectosigmoid, SIR | C19-C21 | <5                     | 1.22  | 0.25–3.56 | 16                       | 0.83  | 0.47–1.35 | 18                     | 1.07  | 0.64–1.70 |
| Rectum, rectosigmoid, SMR | C19-C21 | 0                      | 0.00  | 0.00–3.97 | <5                       | 0.62  | 0.17–1.58 | 14                     | 1.70  | 0.93–2.85 |

|                                      |              |    |      |            |     |      |            |     |      |           |
|--------------------------------------|--------------|----|------|------------|-----|------|------------|-----|------|-----------|
| Liver, gallbladder, bile ducts, SIR  | C22-C24      | <5 | 1.45 | 0.04–8.07  | <5  | 0.91 | 0.25–2.33  | 7   | 1.72 | 0.69–3.55 |
| Liver, gallbladder, bile ducts†, SMR | C22-C24      | <5 | 1.95 | 0.05–10.9  | <5  | 1.26 | 0.34–3.24  | 6   | 1.78 | 0.65–3.87 |
| Larynx, SIR                          | C32          | 0  | 0.00 | 0.00–6.12  | <5  | 0.74 | 0.15–2.16  | 9   | 3.99 | 1.82–7.57 |
| Larynx, SMR                          | C32          | 0  | 0.00 | 0.00–34.9  | <5  | 1.00 | 0.03–5.56  | <5  | 3.00 | 0.62–8.77 |
| Lung, SIR                            | C33-C34      | <5 | 1.00 | 0.27–2.56  | 29  | 0.68 | 0.46–0.98  | 48  | 1.33 | 0.98–1.77 |
| Lung, SMR                            | C33-C34      | <5 | 0.73 | 0.09–2.63  | 20  | 0.61 | 0.37–0.94  | 39  | 1.23 | 0.88–1.68 |
| Cutaneous melanoma, SIR              | C43          | 10 | 1.21 | 0.58–2.22  | 24  | 1.42 | 0.91–2.12  | 13  | 1.18 | 0.63–2.01 |
| Cutaneous melanoma, SMR              | C43          | 0  | 0.00 | 0.00–1.94  | 10  | 2.63 | 1.26–4.84  | <5  | 0.99 | 0.20–2.88 |
| Non-melanoma skin*, SIR              | C44          | <5 | 1.32 | 0.16–4.78  | 10  | 1.02 | 0.49–1.88  | 23  | 0.95 | 0.60–1.43 |
| Non-melanoma skin*, SMR              | C44          | 0  | 0.00 | 0.00–103   | 0   | 0.00 | 0.00–10.5  | <5  | 1.36 | 0.03–7.58 |
| Mesothelioma, SIR                    | C45          | 0  | 0.00 | 0.00–30.5  | <5  | 2.33 | 0.48–6.80  | <5  | 2.74 | 0.75–7.01 |
| Mesothelioma†, SMR                   | C45          | 0  | 0.00 | 0.00–159   | <5  | 3.16 | 0.38–11.41 | <5  | 1.98 | 0.24–7.14 |
| Prostate, SIR                        | C61          | <5 | 2.65 | 0.72–6.79  | 109 | 1.22 | 1.01–1.48  | 101 | 1.11 | 0.91–1.35 |
| Prostate, SMR                        | C61          | 0  | 0.00 | 0.00–22.03 | 7   | 0.72 | 0.29–1.48  | 47  | 1.16 | 0.85–1.54 |
| Testis, SIR                          | C62          | 15 | 1.47 | 0.82–2.43  | <5  | 1.10 | 0.13–3.97  | 0   | 0.00 | 0.00–12.7 |
| Testis, SMR                          | C62          | 0  | 0.00 | 0.00–4.86  | 0   | 0.00 | 0.00–12.3  | 0   | 0.00 | 0.00–25.8 |
| Kidney**, SIR                        | C64          | <5 | 0.78 | 0.09–2.80  | 12  | 0.97 | 0.50–1.69  | 15  | 1.96 | 1.10–3.23 |
| Kidney**, SMR                        | C64          | <5 | 3.01 | 0.36–10.9  | <5  | 0.83 | 0.23–2.13  | <5  | 0.82 | 0.22–2.11 |
| Urinary tract***, SIR                | C65-C68      | <5 | 1.05 | 0.22–3.06  | 23  | 0.96 | 0.61–1.44  | 43  | 1.52 | 1.10–2.04 |
| Urinary tract***, SMR                | C65-C68      | 0  | 0.00 | 0.00–12.0  | <5  | 0.79 | 0.16–2.30  | 12  | 1.32 | 0.68–2.31 |
| Thyroid, SIR                         | C73          | <5 | 0.75 | 0.02–4.19  | <5  | 2.06 | 0.56–5.27  | <5  | 1.14 | 0.03–6.35 |
| Thyroid, SMR                         | C73          | 0  | 0.00 | 0.00–48.5  | <5  | 2.83 | 0.07–15.8  | <5  | 2.40 | 0.06–13.4 |
| Hodgkin lymphoma, SIR                | C81          | 0  | 0.00 | 0.00–1.51  | <5  | 1.49 | 0.18–5.37  | 0   | 0.00 | 0.00–7.98 |
| Hodgkin lymphoma, SMR                | C81          | 0  | 0.00 | 0.00–6.39  | 0   | 0.00 | 0.00–5.70  | 0   | 0.00 | 0.00–9.89 |
| Non-Hodgkin lymphoma, SIR            | C82-C86, C96 | 6  | 1.60 | 0.59–3.48  | 13  | 1.22 | 0.65–2.09  | 7   | 0.89 | 0.36–1.84 |
| Non-Hodgkin lymphoma, SMR            | C82-C86, C96 | 0  | 0.00 | 0.00–2.92  | 5   | 1.35 | 0.44–3.14  | <5  | 0.87 | 0.24–2.22 |
| Multiple myeloma, SIR                | C90          | 0  | 0.00 | 0.00–3.81  | 5   | 0.93 | 0.30–2.16  | <5  | 0.78 | 0.21–1.99 |
| Multiple myeloma, SMR                | C90          | 0  | 0.00 | 0.00–11.2  | <5  | 0.70 | 0.09–2.55  | 5   | 1.22 | 0.40–2.85 |
| Leukaemia, SIR                       | C91-C95      | <5 | 0.42 | 0.01–2.37  | 8   | 1.05 | 0.45–2.07  | 5   | 0.73 | 0.24–1.71 |
| Leukaemia, SMR                       | C91-C95      | 0  | 0.00 | 0.00–2.62  | <5  | 1.09 | 0.30–2.79  | 6   | 1.16 | 0.43–2.52 |

ICD, International Classification of Diseases; Obs., observed; pyr, person-years.

†Observed number of deaths corrected to be in line with morphologically confirmed diagnoses, as described in the text (Results, paragraph 3–6).

\*Excluding basal cell carcinoma, \*\*Excluding renal pelvis, \*\*\*Including bladder and renal pelvis.
